# Supplementary material
Source: Research Square preprint supplement (doi:10.21203/rs.3.rs-9135322/v1)
Supplement: Supplementary file 2 [file e4b3d124519871008ef896ba.xlsx]

## Sheet: TableS1
Worker Emergence Following Fungal Fruiting May Facilitate Symbiont Acquisition in a Fungus-Growing Termite
Journal of Insect Behavior
Masaru Hojo
University of the Ryukyus, Tropical Biosphere Research Center, Senbaru 1, Nishihara, Okinawa, Japan
Corresponding author: Masaru Hojo
e-mail: masaruhojo0911@gmail.com
ORCID: 0000-0003-0423-1175
Table S1. Opportunistic records of nuptial flight observations of Odontotermes formosanus on Okinawa Island (2018–2025).
Year	Swarming Date	Total rainfall during the five hours before sunset (15:00–19:00) (mm)*
2018	3 June	1.5
2019	14 May	2.5
2019	20 May	6
2020	3 May	20.5
2020	19 May	12
2020	31 May	5.5
2020	8 June	50
2021	2 April	14
2021	9 May	55
2022	5 May	5.5
2023	15 April	22.5
2023	7 May	18
2024	8 April	31
2024	29 April	17.5
2025	26 June	6.5
2025	8 July	75
* Rainfall precipitation were obtained from publicly available meteorological records of the Japan Meteorological Agency (Naha station).
Swarming observations were opportunistic and not based on continuous or systematic monitoring; therefore, absence of records does not indicate absence of swarming activity.
